# Supplementary material
Source: MDPI journal article supplement (https://www.mdpi.com/search?q=pharmaceutics-12-01038)
Supplement: s001 [file pharmaceutics-12-01038-s001.pdf]

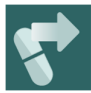

# Supplementary Materials: Anti-Inflammatory Activity of Chitosan and 5-Amino Salicylic Acid Combinations in Experimental Colitis

Henusha D. Jhundoo, Tobias Siefen, Alfred Liang, Christoph Schmidt, John Lokhnauth, Arnaud Béduneau, Yann Pellequer, Crilles Casper Larsen and Alf Lamprecht

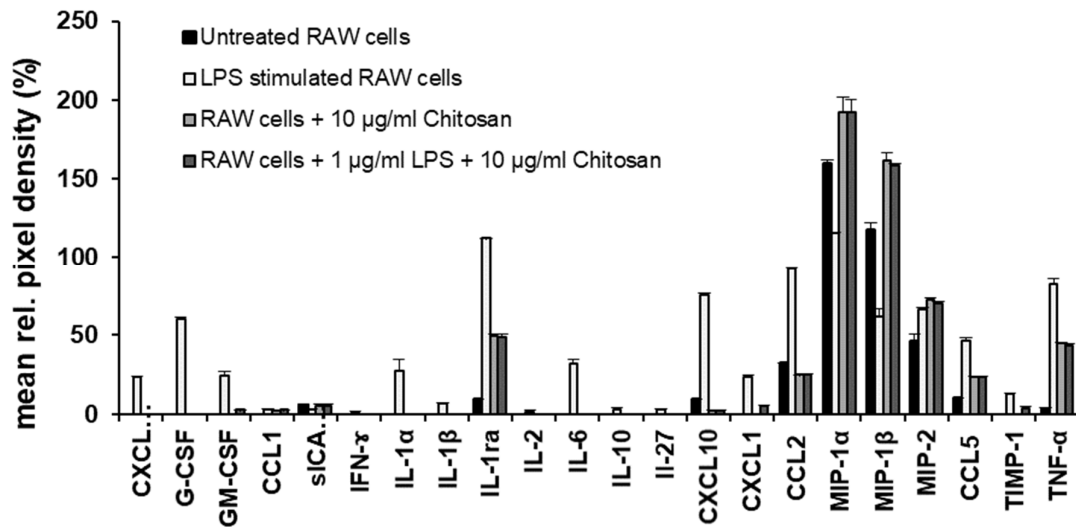

**Figure S1.** Cytokine array for mouse RAW 264.7 macrophage cells that were either untreated, treated with 1 µg/ml LPS for 24 h, treated with 10 µg/ml chitosan for 24 h or treated with 1 µg/ml LPS for 24 h and with 10 µg/ml chitosan for another 24 h.

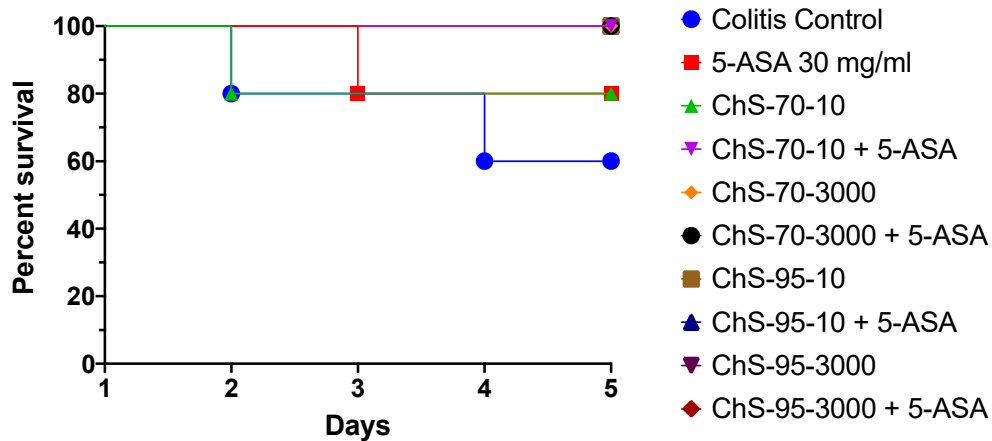

**Figure S2.** Survival rate of mice over experimental period (5 days) after treatment of colitis (90 mg/kg TNBS) with 30 mg/kg chitosans with DD 70% and 95% and viscosity 10 mPas and 3000 mPas respectively and in combination with 30 mg/kg 5-ASA. In all cases treatment with chitosans alone and in combination with 5-ASA led to a 100% survival rate till day 5 except in the case of chitosan-70-10, where the survival rate dropped to 80%. The untreated colitis control group and the 5-ASA group had a survival rate of 60% and 80% respectively. ( $n = 5$ ; \*  $p < 0.05$ , compared to untreated colitis group, log rank test).

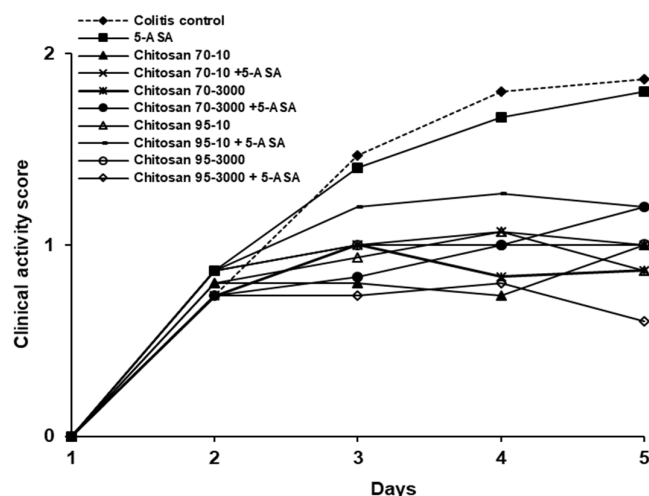

**Figure S3.** Clinical activity score during experimental period (5 days) determined for  $n = 5$  animals after treatment of experimental colitis (90 mg/kg TNBS) with chitosan grades (Ch-70-10, Ch-70-3000, Ch-95-10, Ch-95-3000) at a dose of 30 mg/kg in combination with 5-ASA at a dose of 30 mg/kg ( $n = 5$ ). Colitis was induced on day 1 using TNBS and treatment was administered on day 2, 3 and 4. Animals were sacrificed on day 5. Error bars were omitted for clarity reasons.

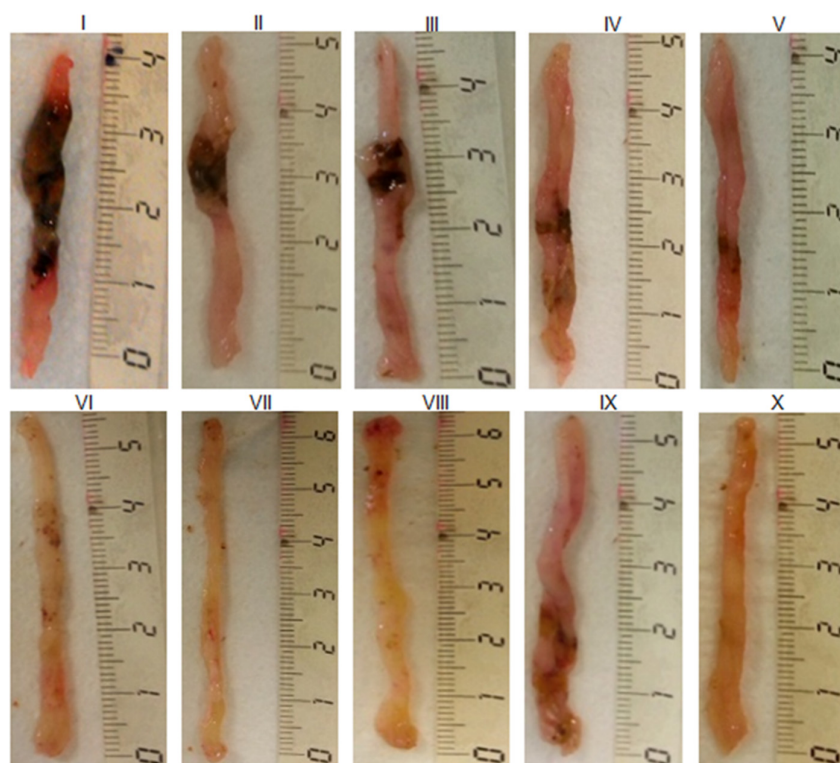

**Figure S4.** Photographs representative of the mouse colon show tissue sections from the (I) control (untreated) colitis group, (II) group treated with 30 mg/kg 5-ASA, (III) 30 mg/kg chitosan 70-10, (IV) 30 mg/kg chitosan 70-10 and 30 mg/kg 5-ASA, (V) 30 mg/kg chitosan 70-3000, (VI) 30 mg/kg chitosan 70-3000 and 30 mg/kg 5-ASA, (VII) 30 mg/kg chitosan 95-10, (VIII) 30 mg/kg chitosan 95-10 and 30 mg/kg 5-ASA, (IX) 30 mg/kg chitosan 95-3000 and (X) 30 mg/kg chitosan 95-3000 and 30 mg/kg 5-ASA in experimental colitis induced using 90 mg/kg TNBS.

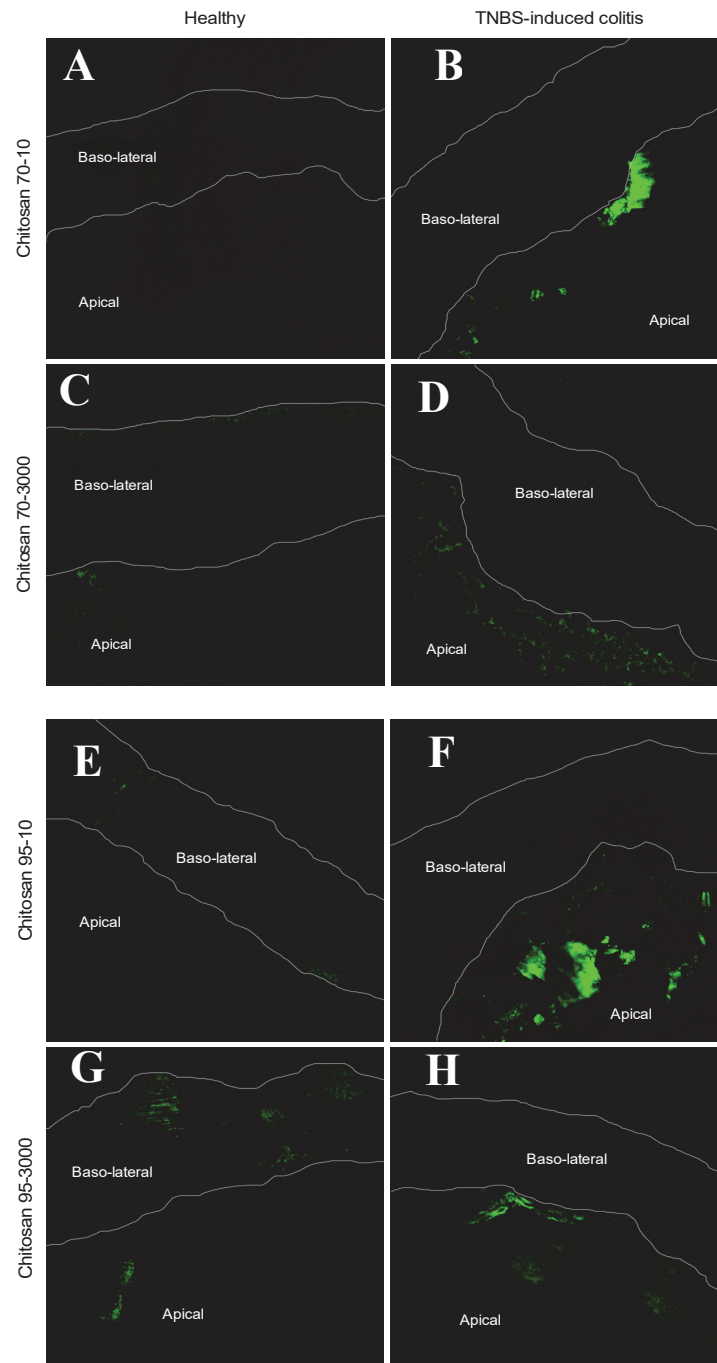

**Figure S5.** CLSM images obtained after intrarectal administration of labelled chitosan stained with FITC and shown in green to healthy mice and TNBS-induced colitis mice. Images A and B were obtained after administration of chitosan 70% DD and 10 mPas to healthy and colitis mice. Similarly, images C and D were obtained after administration of chitosan 70% DD and 3000 mPas, E and F were obtained after administration of chitosan 95% DD and 10 mPas and G and H were obtained after administration of chitosan 95% DD and 3000 mPas to healthy and colitis mice.

**Table S1.** Physicochemical properties of chitosan grades.

| <b>Chitosan (ChS)</b> | <b>Molecular weight<br/>(M<sub>w</sub> by GPC, kDa)</b> | <b>Viscosity (1% <i>w/v</i> in 1% <i>v/v</i><br/>acetic acid, mPas)</b> | <b>Degree of deacetylation<br/>(%)</b> |
|-----------------------|---------------------------------------------------------|-------------------------------------------------------------------------|----------------------------------------|
| Chitosan-70-10        | 20-100                                                  | 8-15                                                                    | ≤ 67.6-72.5                            |
| Chitosan-70-500       | 200-400                                                 | 351-750                                                                 | ≤ 67.6-72.5                            |
| Chitosan-70-3000      | 250-550                                                 | 2751-3250                                                               | ≤ 67.6-72.5                            |
| Chitosan-95-10        | 20-100                                                  | 8-15                                                                    | ≥ 92.6                                 |
| Chitosan-95-500       | 200-400                                                 | 351-750                                                                 | ≥ 92.6                                 |
| Chitosan-95-3000      | 250-550                                                 | 2751-3250                                                               | ≥ 92.6                                 |
